# Supplementary material for: Universal Method for the Purification of Recombinant AAV Vectors of Differing Serotypes
Source: PubMed Central journal article supplement — Mol Ther Methods Clin Dev. 2017 Dec 22;9:33–46. doi: 10.1016/j.omtm.2017.12.004 (PMC5767896; doi:10.1016/j.omtm.2017.12.004), 2017-12-22
Supplement: mmc1.pdf [file mmc1.pdf]

**OMTM, Volume 9**

## **Supplemental Information**

### **Universal Method for the Purification of Recombinant AAV Vectors of Differing Serotypes**

**Shelley A. Nass, Maryellen A. Mattingly, Denise A. Woodcock, Brenda L. Burnham, Jeffrey A. Ardinger, Shayla E. Osmond, Amy M. Frederick, Abraham Scaria, Seng H. Cheng, and Catherine R. O'Riordan**

Table S1

| Vector             | Productivity (vg/cell) |
|--------------------|------------------------|
| AAVDJ <sub>1</sub> | 3.0e4                  |
| AAVDJ <sub>2</sub> | 4.0e4                  |
| AAVDJ <sub>3</sub> | 6.6e4                  |
| AAVDJ <sub>4</sub> | 6.8e4                  |
| AAVDJ <sub>5</sub> | 7.2e4                  |
| AAVDJ <sub>6</sub> | 3.7e4                  |
| AAVDJ <sub>7</sub> | 1.8e4                  |
| AAVDJ              | 1.6e4                  |

VG: Vector Genomes

Table S2

## a Purification of AAV1

| <b>AAV1<sub>TTX</sub></b> |             |         |           |            |
|---------------------------|-------------|---------|-----------|------------|
| Resin                     | Volume (mL) | VGs/mL  | Total VGs | % Recovery |
| <b>AVB</b>                |             |         |           |            |
| Load                      | 452         | 5.24e11 | 2.3e14    | 100        |
| FT                        | 452         | 2e10    | 9e12      | 4          |
| Wash                      | 75          | LOD     | LOD       | <1         |
| Elution                   | 13.2        | 1.35e13 | 1.78e14   | 77         |
| <b>IEX</b>                |             |         |           |            |
| Load                      | 35          | 3.4e12  | 1.2e14    | ~100       |
| FT                        | 35          | LOD     | LOD       | <1         |
| Wash                      | -           | LOD     | LOD       | <1         |
| Elution                   | 8           | 1.08E13 | 1.62E14   | 67         |
| <b>AAV1<sub>PCL</sub></b> |             |         |           |            |
| <b>AVB</b>                |             |         |           | -          |
| Load                      | 1650        | 1.4e11  | 2.32e14   | 100        |
| FT                        | 1635        | 1e9     | 1.66e12   | 2.4        |
| Wash                      | 100         | 6e8     | 6.34e10   | <1         |
| Elution                   | 8.37        | 1.4e13  | 1.17e14   | 50.4       |
| <b>IEX</b>                |             |         |           |            |
| Load                      | 15.56       | 8.09e12 | 1.26e14   | -          |
| FT                        | 12          | 3.51e6  | 5.65e7    | 5          |
| Wash                      | 75          | 1.43e6  | 7.25e07   | <1         |
| Elution                   | 20          | 3.26e12 | 6.56e13   | 52         |

Table S2

## b Purification of AAV5

| <b>AAV5<sub>TTX</sub></b> |             |         |           |            |
|---------------------------|-------------|---------|-----------|------------|
| Resin                     | Volume (mL) | VGs/mL  | Total VGs | % Recovery |
| <b>AVB</b>                |             |         |           |            |
| Load                      | 513         | 3.93e11 | 2e14      | -          |
| FT                        | 513         | 9.39e9  | 4.81e12   | 2.4        |
| Wash                      | 144         | 1.38e9  | 1.99e11   | <1         |
| Elution                   | 24          | 7.64e12 | 1.83e14   | 91.5       |
| <b>IEX</b>                |             |         |           |            |
| Load                      | 65          | 2.21e12 | 1.44e14   | -          |
| FT                        |             | LOD     |           | <1         |
| Wash                      |             | LOD     |           | <1         |
| Elution                   | 22          | 3.5e12  | 7.76e13   | 54         |
| <b>AAV5<sub>PCL</sub></b> |             |         |           |            |
| <b>AVB</b>                |             |         |           | -          |
| Load                      | 2976        | 1.2e11  | 3.6e14    | Load       |
| FT                        | 2976        | 8e8     | 2.4e12    | 0.7        |
| Wash                      | 265         | 1.6e8   | 4.2e10    | 0          |
| Elution                   | 33          | 7.5e12  | 2.5e14    | 69         |
| <b>IEX</b>                |             |         |           |            |
| Load                      | 56          | 3.7e12  | 2.07e14   | -          |
| FT                        | 60          | 2.8e6   | 1.68e8    | 7.5        |
| Wash                      | 48          | 2.3e5   | 1.1e7     | <1         |
| Elution                   | 20          | 7.7e12  | 1.54e14   | 74         |

VG: Vector Genomes; IEX: Ion Exchange; FT: Flow Through; TTx: Triple Transfection Produced Vector; PCL: Producer Cell Line Produced Vector
